# Supplementary material for: Leveraging solid–liquid interaction to fabricate drug-microsphere in site encapsulated bone-repair scaffolds
Source: Royal Society of Chemistry journal article supplement (doi:10.1039/d5mh01359c), 2025-10-15
Supplement: d5mh01359c1.pdf [file d5mh01359c1.pdf]

## Supporting Information

### Leveraging solid-liquid interaction to fabricate drug-microsphere *in site* encapsulated bone-repair scaffolds

Fengxin Zhao<sup>a</sup>, Puxin Liu<sup>a</sup>, Xinyi Wang<sup>a</sup>, Jirong Yang<sup>b c\*</sup>, Changshun Ruan<sup>b c\*</sup>, Dongxiao Li<sup>d</sup>,

Xiangdong Zhu<sup>a</sup>, Yumei Xiao<sup>a \*</sup>, Xingdong Zhang<sup>a</sup>.

<sup>a</sup> National Engineering Research Center for Biomaterials, College of Biomedical Engineering,  
Research Center for Material Genome Engineering, Sichuan University, Chengdu, 610065, China

<sup>b</sup> Research Center for Human Tissue and Organ Degeneration, Institute of Biomedical and  
Biotechnology, Shenzhen Institute of Advanced Technology, Chinese Academy of Sciences,  
Shenzhen, 518055, China

<sup>c</sup> University of Chinese Academy of Sciences, Beijing, 100049, China

<sup>d</sup> Sichuan Academy of Chinese Medicine Science, Chengdu, Sichuan, 610042, China

**\* Corresponding author.**

E-mail addresses: jr.yang@siat.ac.cn (J. Yang), cs.ruan@siat.ac.cn (C. Ruan),  
xymzl2000@126.com (Y. Xiao)

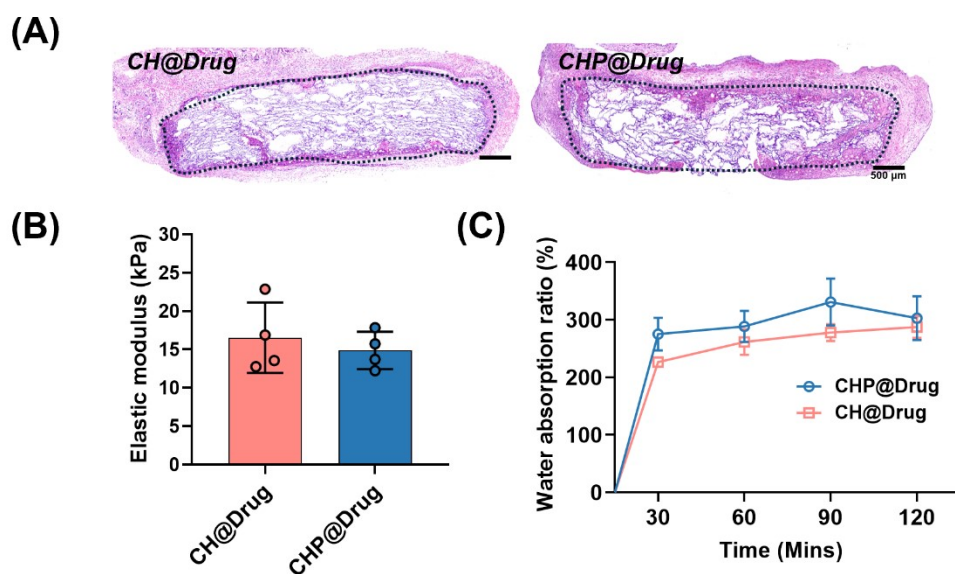

**Fig. S1** A) The gross view of tissue infiltration of CH@Drug and CHP@Drug B) The mechanical properties of CHP@Drug and CH@Drug (n=4). C) The water absorption ratio of CHP@Drug and CH@Drug.

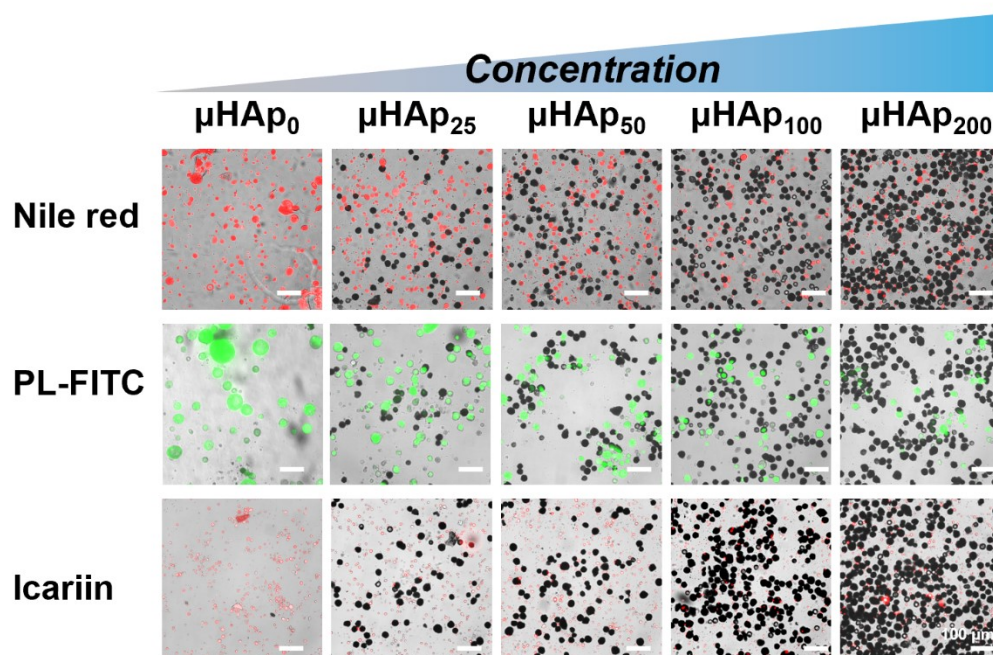

**Fig. S2** The gross view of fluorescent molecules labeled PMD with different  $\mu\text{HAp}$  content.

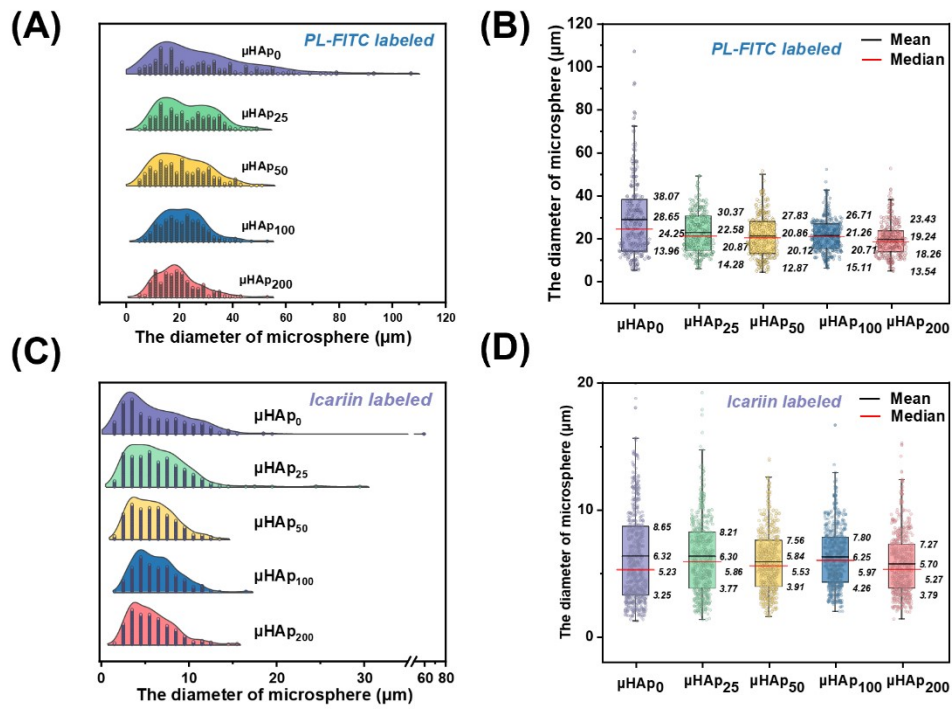

**Fig. S3** A) The kernel density estimation and B) the box plot of statistical results of PL-FITC labeled PMD. C) The kernel density estimation and D) the box plot of statistical results of Icarin labeled PMD (the four values are: upper quartile, mean, median, and lower quartile).

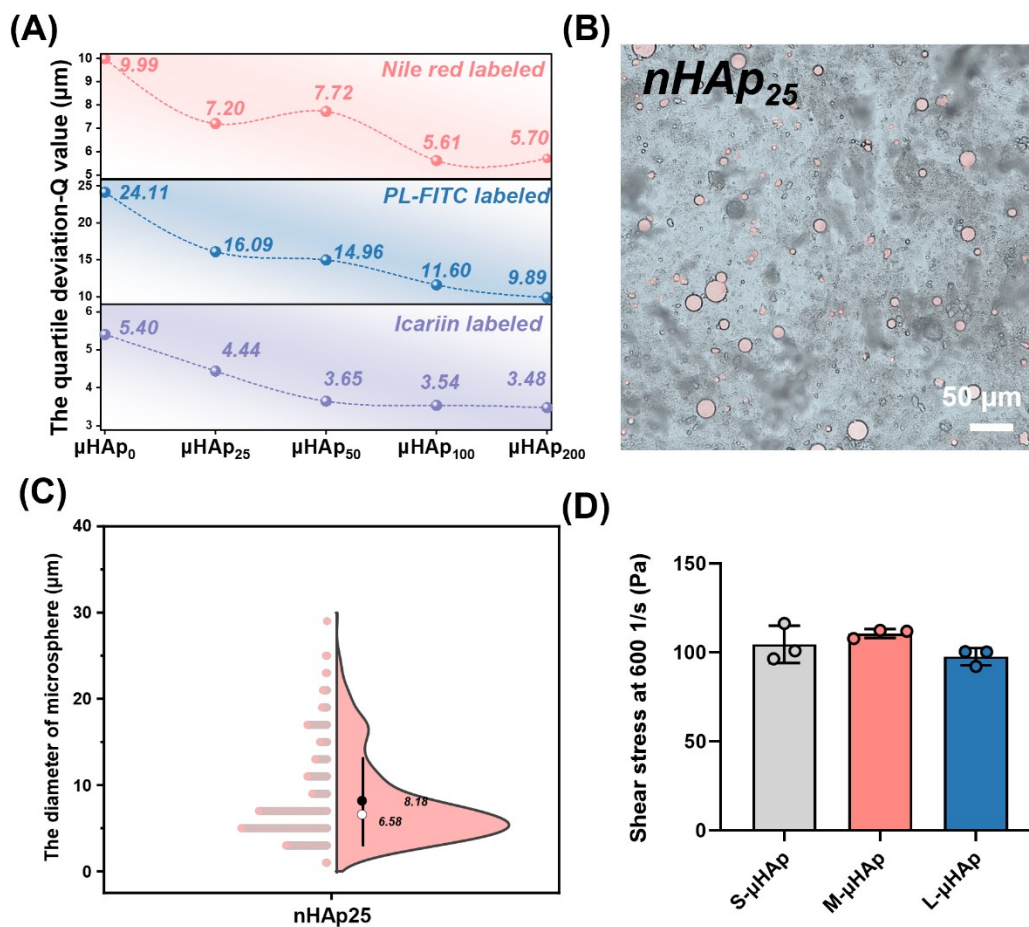

**Fig. S4** A) The quartile deviation-Q of Nile Red labeled, FITC-PL labeled, and Icariin labeled microspheres with different  $\mu\text{HAp}$  content, respectively. B) PMD formed with the nHAp at a concentration of 25 mg/mL. C) The diameter statistical results of PMD (n=300). D) Quantitative results of shearing stress in aqueous solutions with different size  $\mu\text{HAp}$ .

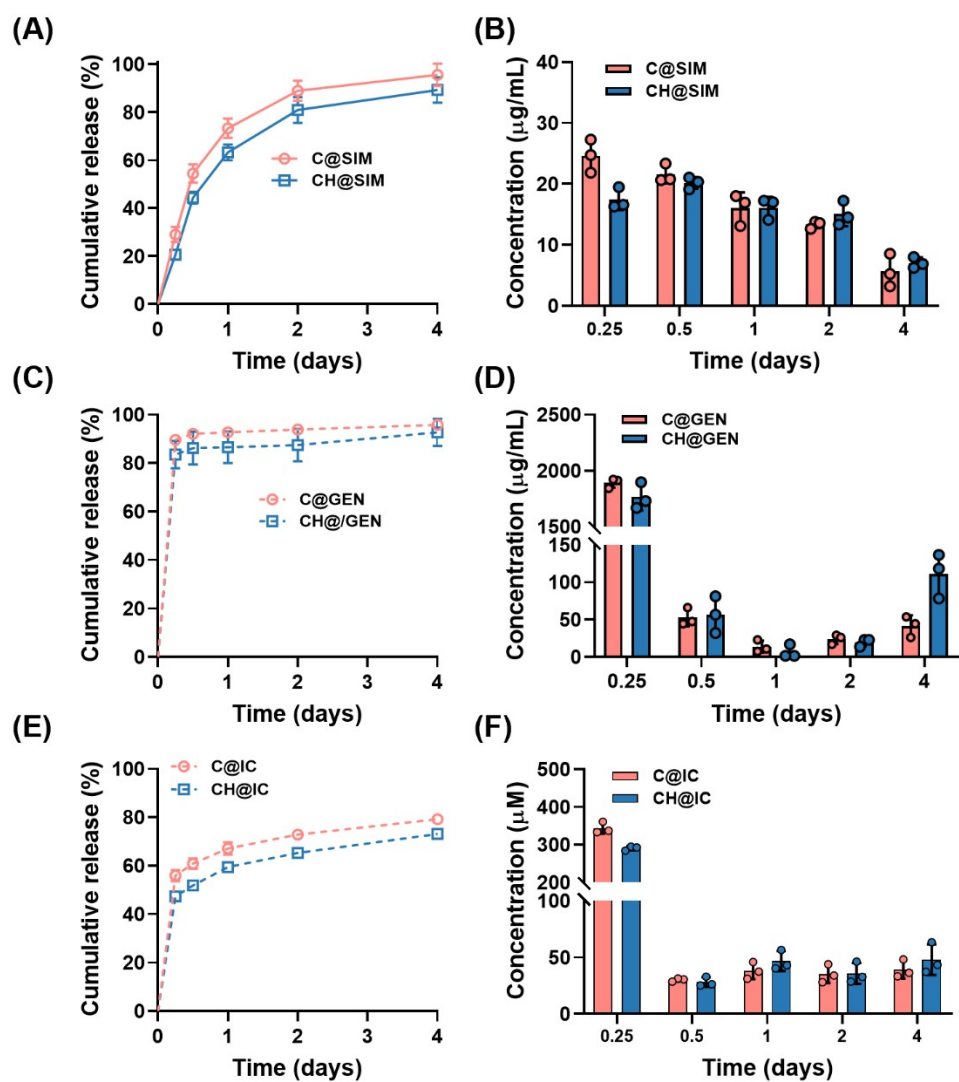

**Fig. S5** A) and B) The release behavior of C@SIM and CH@SIM. C) and D) The release behavior of C@GEN and CH@GEN. E) and F) The release behavior of C@IC and CH@IC.

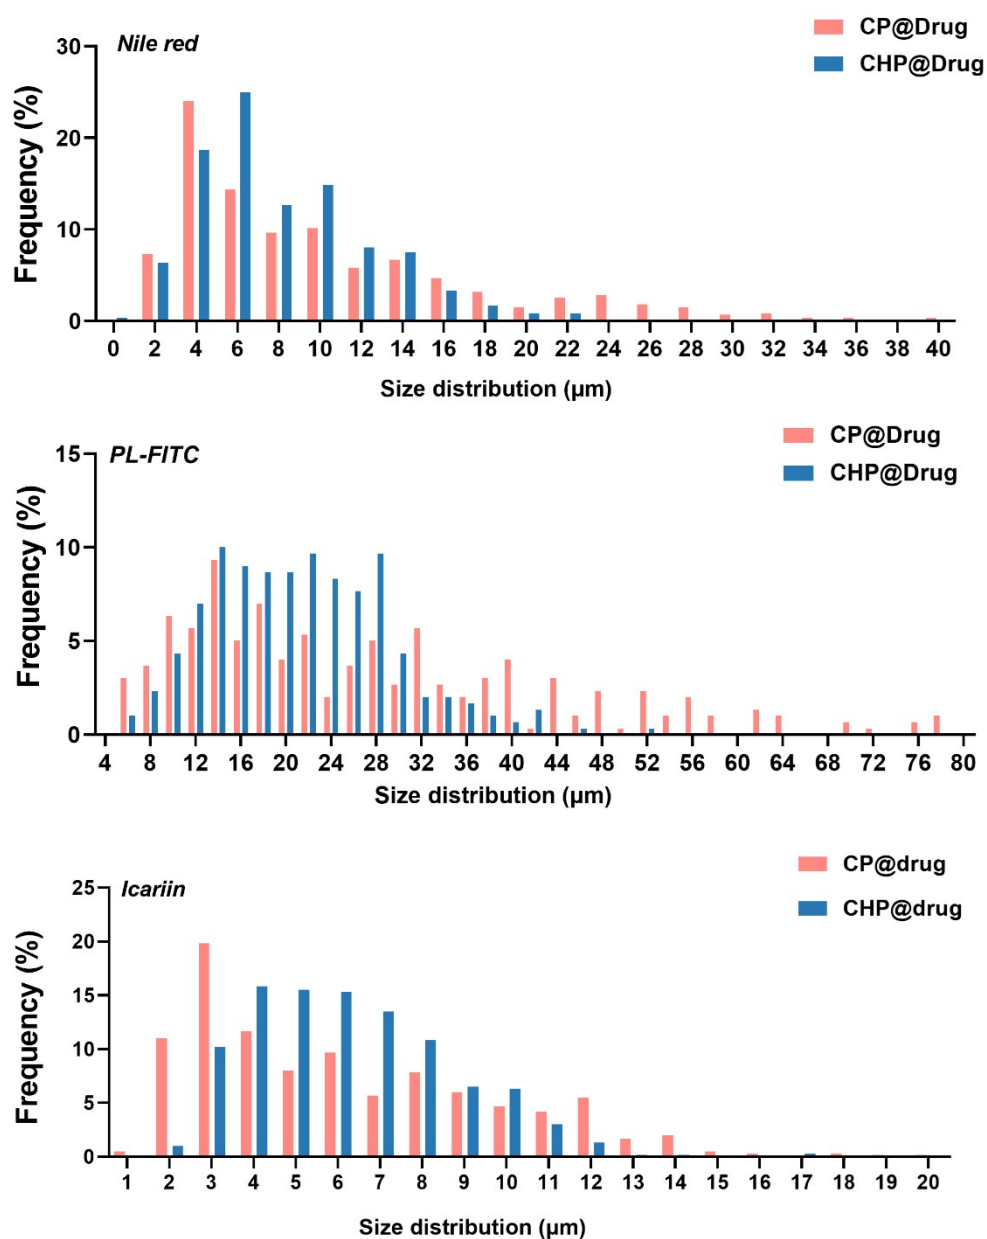

**Fig. S6** The frequency distribution of microspheres contained different solubility properties drug in CP@Drugs and CHP@Drugs.

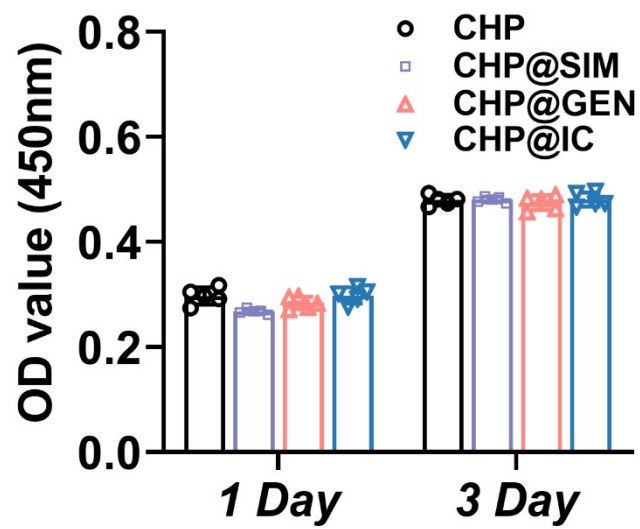

**Fig. S7** The cell proliferation activity of BMSCs on CHP, CHP@SIM, CHP@GEN and CHP@IC.



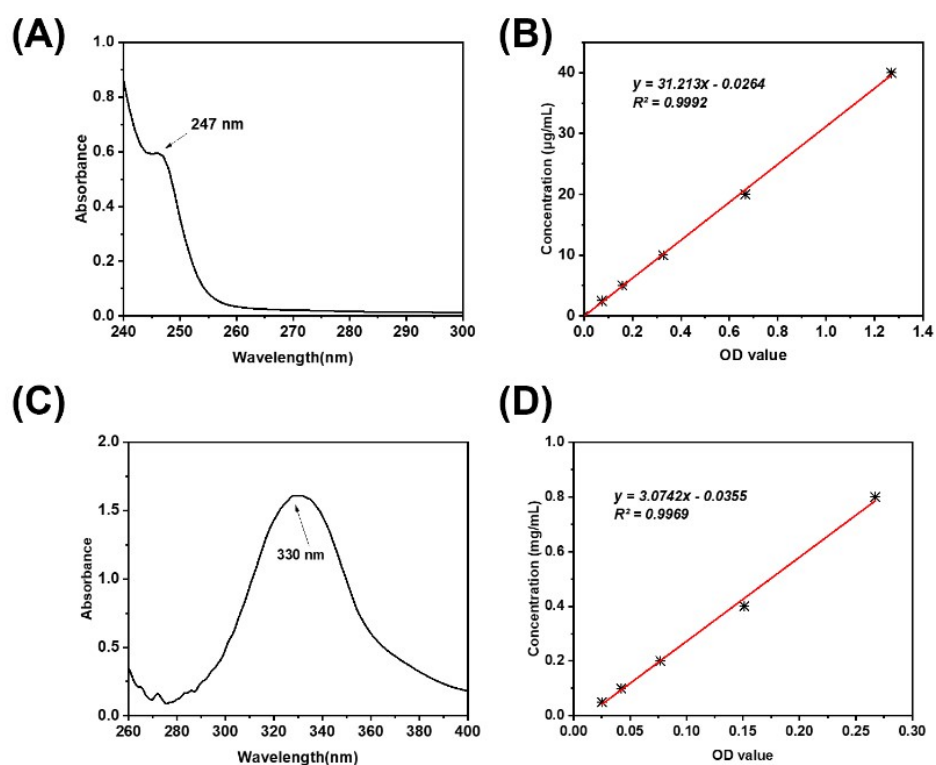

**Fig. S8** A) The ultraviolet-visible spectrum of simvastatin. B) The standard curve of simvastatin concentration. C) The ultraviolet-visible spectrum of Gentamicin sulfate measured by derivatization method. B) The standard curve of Gentamicin sulfate concentration.
